## Title

Even neurotypical children are heterogeneous: using multivariate decoding to improve individual subject analysis of lexico-semantic EEG data

## Authors, affiliations

Selene Petit<sup>\*,a,b</sup>, Nicholas A. Badcock<sup>a,b</sup>, Tijl Grootswagers<sup>a,b,c</sup>, and Alexandra Woolgar<sup>a,b,d</sup>

a. Department of Cognitive Science, Macquarie University, Australia

b. ARC Centre of Excellence in Cognition and its Disorders (CCD)

c. School of Psychology, University of Sydney, Australia

d. Medical Research Council (UK), Cognition and Brain Sciences Unit, University of Cambridge, Cambridge, UK

\*. Corresponding author at: Department of Cognitive Science, Macquarie University, Australia. [Selene.petit@mq.edu.au](mailto:Selene.petit@mq.edu.au)

## Abstract

In conditions such as minimally-verbal autism, standard assessments of language comprehension are often unreliable. Given the known heterogeneity within the autistic population, it is crucial to design tests of semantic comprehension that are sensitive in individuals. Recent efforts to develop neural signals of language comprehension have focused on the N400, a robust marker of lexical-semantic violation at the group level. However, homogeneity of response in individual neurotypical children has not been established. Here, we presented 20 children with congruent and incongruent visual animations and spoken sentences while measuring their neural response using EEG. Despite robust group-level responses, we found high inter-individual variability in response to lexico-semantic anomalies. To overcome this, we analysed our data using temporally and spatially unconstrained MVPA, supplemented by descriptive analyses to examine the timecourse,

topography, and strength of the effect. Even neurotypical children exhibit heterogeneous responses to lexical-semantic violation, implying that any application to heterogeneous disorders such as ASD will require individual-subject analyses that are robust to variation in topology and timecourse of neural responses.

## Keywords

EEG, multivariate pattern analyses, lexico-semantic processing, inter-individual variability, sensitivity, N400

## 1 Introduction

In a variety of conditions, the absence of spoken language does not necessarily reflect an absence of comprehension. In addition, poor language production is not always associated with low verbal or non-verbal IQ (Chan et al., 2005; Kjelgaard and Tager-Flusberg, 2001; Sigurdardottir and Vik, 2011). For populations that are unable to overtly communicate, such as people in a vegetative state, or with cerebral palsy or non-verbal autism (Geytenbeek et al., 2010; Giacino and Smart, 2007; Tager-Flusberg and Kasari, 2013), an accurate assessment of cognitive and language aptitudes is essential. Yet in those cases, traditional testing materials often fail to capture the full cognitive and language abilities of these individuals. This is due to the various constraints imposed by the standardized testing environment and materials, and the social constraints associated with the examiner-examinee interactions (Kasari et al., 2013; Plesa Skwerer et al., 2016). To assess cognitive and language abilities of these populations, we need to develop objective, fast, and reliable measures of cognition and language comprehension. One possible avenue, which bypasses the need for overt communication, is to measure neural responses using event-related potentials (ERPs) measured with electroencephalography (EEG). Recent work has used this approach to assess covert cognitive abilities in non-communicative populations (see a recent review by Harrison and Connolly, 2013). In particular, language processing has been studied using EEG including in patients with disorder of consciousness (Hinterberger et al., 2005; Kotchoubey et al., 2005), schizophrenia (Mathalon et al., 2002; Sharma et al., 2017), and autistic individuals (Coderre et al., 2017; Pijnacker et al., 2010; Wang et al., 2017). However, in these cases, EEG research has focused on the population-level, with minimal data reported on an individual-participant

basis. Yet, in order to design a clinical test of language comprehension, and particularly given the known heterogeneity in developmental disorders such as ASD, it is critical to use paradigms and methods that reliably elicit meaningful brain signals in individuals. In this study, we developed and assessed a new EEG paradigm to measure language comprehension in individual children. We reported on the heterogeneity of neural responses to semantic anomalies of speech using different data analysis techniques.

The N400 ERP is a well-studied component that indexes the semantic integration of words into their context. The N400 effect is a more negative-going electrical potential when participants read or listen to words presented in an incongruent semantic context, relative to a congruent semantic context (Kutas and Federmeier, 2011). As such, it seems to be a well-suited candidate for the assessment of lexico-semantic processing. The N400 has been widely reported in groups of typical adults, children, and special populations, including recently in autistic children (Cantiani et al., 2016; Coderre et al., 2019; DiStefano et al., 2019). However, despite the recent interest in using N400 as an assessment tool, individual subject level analyses are rarely reported. Additionally, studies that do report individual-subject data are often limited by methodological or conceptual factors, such as a lack of proper statistical analyses, or lack of a control group. Recently, two studies have looked at the individual sensitivity of auditory N400 paradigms, in healthy adults (Cruse et al., 2014), and in healthy children (Petit et al., 2019). These studies each used two paradigms contrasting auditory words presented in congruent or incongruent semantic contexts. Using a task in which participants were asked to make covert violation decisions, these studies reported a statistically significant N400 effect in a maximum of 58% of neurotypical adults (Cruse et al., 2014) and 56% of neurotypical children (Petit et al., 2019). This moderate sensitivity reflects the challenges associated with assessing ERPs at the individual level. However, using multivariate pattern analyses (MVPA) on these EEG data, we recently increased the individual-subject detection rate to 88% (Petit et al., 2019). In the current study, we aimed to build on existing N400 paradigms by improving the stimulus delivery paradigm and by using a more robust and sensitive analysis framework. Our goal was to derive a highly sensitive measure of language comprehension in individual children.

We set out to extend the paradigm developed in Petit et al. (2019), and to measure neural differential responses to auditory words presented in congruent and incongruent sentences frames (i.e., “The squirrel stored nuts in the *tree/door*”). In order to increase children’s

engagement to the task, and build up strong semantic contexts, the spoken sentences were accompanied by short animated cartoons (*e.g.*, an animation of a squirrel storing nuts in a tree). With clinical applications in mind, our paradigm presented a semi-covert task, in which participants were asked to silently judge the semantic congruency of each sentence in their head, with occasional button press requests to check for compliance. Additionally, we explored several analyses of the EEG data to illustrate the inter-individual variability of neural responses.

With traditional within-individual ERP analyses, it is necessary to choose *a priori* time windows, and electrodes, of interest, in order to reduce the number of comparisons and thus increase the statistical power. However, we have previously demonstrated that for individual subject analysis, *a priori* assumptions about spatio-temporal location should be avoided as there is substantial inter-individual variability in the location and timing of N400-like effects (Petit et al., 2019). For clinical populations, for whom inter-individual variability may be even higher, it is essential to allow some inter-individual variability in the location and timing of the effect of interest. To allow for this without increasing multiple comparisons, we previously used multivariate pattern analyses (MVPA). This approach uses the signal recorded across all the EEG channels to detect patterns of brain activation that reliably distinguish between two conditions, in this case, between identical words presented in different lexico-semantic contexts. Using MVPA at each time point, we retain information about when an effect occurs, but allow it to arise from any spatial location. In the current study, we again used MVPA, but additionally dropped the requirement for time-resolved results, allowing the classifier to detect an effect with any spatial configuration and any temporal profile in an effort to increase our detection rate. This allowed us to detect differences in the brain's pattern of activity irrespective of the location and the timing of the difference. Having detected a statistical difference using this approach, time-resolved MVPA and univariate approaches can then be used to qualitatively describe the temporal and topographic distribution of the effect. In this study, we sought to design an engaging, covert paradigm to elicit individuals' neural responses to semantic violations within spoken sentences. We contrasted congruent and incongruent sentences, and measured the brain response of children using EEG, and we analysed the data using MVPA and univariate N400 analyses. We found the strongest detection rate using an unconstrained MVPA approach, reaching a medium detection rate (13/20 participants). Univariate analyses were less sensitive, possibly due to the need to restrict the analyses to a predefined brain region for

appropriate statistical power. We additionally provide evidence for this claim by illustrating the high inter-individual variability in the location and timing of the discriminative neural signals.

## 2 Methods

All presentation scripts, stimuli, and raw data available at <https://osf.io/bv2dy/>.

### 2.1 Stimulus development and validation

#### 2.1.1 Congruent stimuli

The stimuli consisted of 94 congruent and 94 incongruent sentences. The congruent sentences were adapted from the norms of Block and Baldwin (2010), who reported the cloze-probability of 498 sentences for adults in the USA. We started by selecting the 450 sentences with a cloze probability higher than 50%. (*i.e.*, more than 50% of the participants completed a given incomplete sentence with the same target word), and for which the target word was a noun. From this set, we then selected only the 242 sentences in which the target word and of all the keywords were of high frequency (Zipf Log10 frequency > 3.5), according to the children section of the SUBTLEX-UK word database (van Heuven et al., 2014). This removed sentences that were not suitable for children.

To facilitate the splicing of the target word from the audio recording, we retained only the 105 sentences in which the boundary between the incomplete sentences and the target was a plosive sound (/t/, /d/, /k/, /p/, /b/, or /g/), and the 35 sentences in which it was possible to add an adjective ending in a plosive sound before the target without disrupting the meaning of the sentence (*e.g.*, To cut the chicken Sue needed a *sharp* knife – see Table 1). The remaining 140 sentences were recorded by a female, native Australian-English speaker. In order to make sure that the congruent sentences were highly congruent for children, eighteen native English speaker children, aged 8- to 12-years old (M = 9:11, range = [8:4 to 11:11]) participated in a validation experiment. We presented participants with each of the 140 incomplete sentences, and asked them to say the word they thought would best complete each sentence. We then selected only the sentences with a target cloze probability of over 60%, leaving a full stimulus set of 94 sentences (see Supplementary Table S1 for a complete list of the stimuli).

### 2.1.2 Incongruent stimuli

In order to generate an incongruent condition in which the target words and sentence frames were perfectly matched with the congruent condition, we swapped the target words of pairs of congruent sentences (see Table 1). Each target and each incomplete sentence was thus presented once in the congruent condition, and once in the incongruent condition. When recombining targets with incongruent sentences frames, we ensured that the target did not violate syntactic structure of the sentence, including matching for plurality. Furthermore, we ensured that the incongruent target did not start with the same sound nor rhyme with the congruent target.

Table 1. Example of congruent and incongruent sentences. The conditions are matched by pairing the targets between the two conditions. In some cases (last two rows), we added an adjective (*italics*) ending with a plosive sound before the target word to facilitate audio splicing.

| Incongruent sentence                         | Congruent sentence                           | Target |
|----------------------------------------------|----------------------------------------------|--------|
| In autumn, leaves fall off the               | After dinner, they washed the                | dishes |
| After dinner, they washed the                | In autumn, leaves fall off the               | trees  |
| They raised pigs on their <i>private</i>     | To cut the chicken Sue needed a <i>sharp</i> | knife  |
| To cut the chicken Sue needed a <i>sharp</i> | They raised pigs on their <i>private</i>     | farm   |

### 2.1.3 Animations

For each congruent sentence, we designed a short, colourful, animated cartoon using that matched the meaning of the sentence, using Adobe Photoshop CC 2017. The animation corresponded to the congruent version of the sentence, and each animation was presented twice, once in each condition (*e.g.*, the animation of a leaves falling off autumnal trees was presented with the sentence “in autumn, leaves fall off the *trees*”, and with “in autumn, leaves fall of the *dishes*”).

## 2.2 EEG experiment

### 2.2.1 Participants

Twenty children aged 9 to 12 years ( $M = 10:6$ ,  $SD = 0:11$ , 12 males and 8 females) were recruited through the Neuronauts database of the Australian Research Council Centre of Excellence in Cognition and its Disorders. All participants were native English speakers, and received \$25 for their participation. This study was approved by the Macquarie University Human Research Ethics Committee (Reference number: 5201200658).

## 2.2.2 Experimental procedure

Participants were seated in front of a computer screen in a lightly dimmed room. The auditory sentences were presented via speakers on both sides of the screen, and the corresponding animations played on the screen at a visual angle of approximately 4° of height and width.

All 188 sentences were presented once within a single recording session, in a pseudo-random order that was optimised to minimise bias in the sequence of congruent and incongruent trials. Additionally, all of the sentence frames were presented once in either condition before they could be presented again in the other condition. We chose to present each complete sentence only once to minimise repetition effects and to limit the length of the recording session. For our main analysis (below) we calculated that 94 trials per condition would give us 96% power to detect a medium effect (Cohen's  $d = 0.5$ ) at the individual-subject level.

Each trial started with a central fixation cross, displayed for two seconds, followed by the presentation of a sentence. The animation started with the beginning of the auditory sentence, and included a 500 ms gradual fade-in and a 500 ms fade-out to minimise abrupt onsets and reduce eye-movements. The animation disappeared one second before the target word was presented, to ensure that EEG responses to visual information did not contaminate the response to the target word (see Figure 1).

We presented the participants with six practice trials at the start of the experiment to ensure they understood the instructions. Participants were instructed to listen carefully to each sentence and covertly decide whether the sentence was correct or incorrect. Additionally, on some trials, participants were asked to quickly indicate their judgement by pressing a button with their right hand. On these trials a response screen was presented with a green “tick” (“correct meaning”) and a red cross (“incorrect meaning”) on either side of the display. A central vertical bar decreasing in size indicated the time left to answer (4 seconds in total). Question trials occurred approximately every 7 trials, with a jitter of  $\pm 3$  trials so they were unpredictable. The red cross and the green tick appeared randomly on either side of the screen, so participants could not anticipate which button they would have to press. If they answered correctly, the participant was told that they had caught an “evil alien”. If they answered incorrectly, they were shown a semi-masked picture of the alien that they had

“failed to catch”. After each question trial, they were told how many evil aliens they had left to catch.

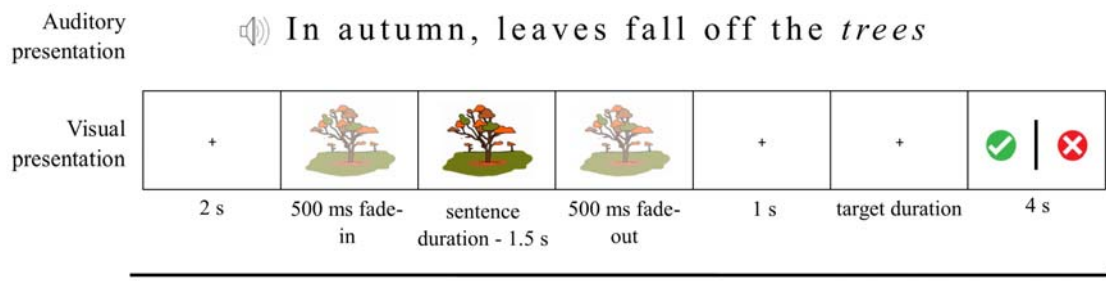

Figure 1. Trial sequence on a question trial. Note that the same animation would be presented for the incongruent version of this sentence (“in autumn, leaves fall off the dishes”). On non-question trials the final display was not shown and the 2s ITI started immediately.

### 2.2.3 EEG recording and pre-processing procedures

We acquired EEG data from a 64-channel ActiveTwo BioSemi (BioSemi, Amsterdam, Netherlands). The electrodes were organized according to the 10-20 system, with two electrodes placed on the left and right mastoids for offline referencing. Electro-oculogram generated from eye movements and eyeblinks was recorded using two facial electrodes, located at the outer canthus of and under the right eye, respectively. The data were digitized at 512 Hz with an online reference to the common mode sense (CMS), and all impedances were kept below 30k $\Omega$ .

We processed the data off-line using the EEGLAB toolbox in MATLAB (Delorme and Makeig, 2004). We first re-referenced the data to the average of the left and right mastoids, then used a bandpass filter between 0.1 and 40 Hz. We then segmented the data into 1100ms epochs time-locked to the onset of the auditory target word (100ms pre-stimulus and 1000ms post-stimulus). To correct for eye-blinks and eye-movements, we ran an Independent Component Analysis (ICA). We removed the components with scalp distributions, time-courses and spectral contents indicative of eye blinks and eye movements. Finally, we applied a baseline correction to the epochs, and either saved all the epochs for subsequent MVPA analyses, or removed epochs with extreme values ( $\pm 200\text{mV}$ ) for subsequent univariate analyses. For the purpose of illustrating the topography of the ERP across the scalp, we removed epochs that had extreme values in any channel. At this point, any channel that contributed to the rejection of more than 10% of the trials at this point was interpolated using spherical interpolation, and the preprocessing was done again using the interpolated



channel(s) from the filtering stage. An average of 1.9 channels were interpolated per participant (range = 0-8). None of the channels in the region of interest (see below) had to be interpolated. For the purpose of analysing the N400 within our region of interest, we removed epochs that had extreme values in any of the 9 channels of interest, in order to preserve data. An average of 4.4 trials were rejected from the region of interest across participants.

#### 2.2.4 Multivariate Pattern Analyses

We performed MVPA using the CoSMoMVPA toolbox (Oosterhof et al., 2016) in Matlab R2017B. For each participant, a support vector machine (SVM) was trained to discriminate between the brain patterns evoked by the two semantic conditions, using a leave-one-target-out cross-validation approach. Data from all electrodes, and all time points in the epoch were used for training. We trained the classifier using a training set consisting of all the trials except the two trials corresponding to a single target word (one from each condition). We then tested the classifier's correct categorization of the remaining two trials. This was repeated 94 times, leaving a different target out each time. We then averaged the accuracy obtained for each target to obtain classifier accuracy for each participant. This yielded a single decoding accuracy score per participant. If this accuracy was significantly above chance (50%), we conclude that there was information in the brain signals that was different between the two semantic conditions. To test for significance, we used a permutation test (Maris and Oostenveld, 2007). This test consists of randomly attributing every trial to one of the two conditions, then running the above classification procedure on these permuted data. We repeated this 1000 times to estimate a null distribution of accuracies. Accuracy was considered significant when the observed accuracy was higher than 95% of the null distributions' accuracies ( $\alpha = .05$ ). We additionally calculated effect sizes for each participant using their mean decoding accuracy and the null distribution, according to the formula:

$$d = \frac{(\text{participant's accuracy} - \text{mean of null distribution})}{\text{standard deviation of null distribution}}$$

Finally, we examined the effect of age on the decoding accuracy using Spearman's correlation.

Having established the presence of a difference in the brain signals, we then performed additional analyses to describe the timecourse and the topology of the effect. We first

computed the timecourse and the topography of the MVPA results, then examined the ERP using univariate analyses of the two conditions.

### 2.2.5 Time-resolved MVPA

In order to quantify the timecourse of the discriminating brain signals, we ran a follow-up analysis where we trained the classifier to distinguish between the two conditions over time. For each time point, we trained the classifier on the data from all electrodes, at that time point and the 10 neighbouring time points (5 on each side). We then repeated this analysis across time points. To test for significance, we used a permutation test and threshold-free cluster enhancement (TFCE), as described by Smith and Nichols (2009), on all time points excluding the baseline. This approach allows for extraction of a statistic of cluster level support at each time point, for the observed accuracy and the permutation results. The maximum TFCE statistic across time of each permutation was used to create a corrected null-distribution. The observed TFCE statistic at each time point was considered significant if it was larger than 95% of the null-distribution. This allowed us to observe the evolution of decoding accuracy over time, thus indicating *when* the classifier could find brain information that discriminated between conditions.

### 2.2.6 Time-space-resolved MVPA

Finally, in order to illustrate both the timecourse and topography of the decoding, we ran a second follow-up decoding analysis allowing the classifier to use the data coming from a subset of neighbouring electrodes (5 electrodes per neighbourhood), and from a subset of neighbouring timepoints (11 timepoints per neighbourhood). We repeated this analysis for each electrode and each time point. This yielded a topographic map of decoding accuracy over time for each participant. For visualisation, we illustrate this topography for decoding accuracy averaged over time within four time-windows spanning 200 to 1000 ms post stimulus onset. Videos of the decoding accuracy evolution over time are available at <https://osf.io/bv2dy/>.

### 2.2.7 Univariate analyses

We defined a region of interest centred around Cz, and the eight surrounding electrodes (Fc1, FCz, FC2, C1, C2, CP1, CPz, and CP2), based on Cruse et al. (2014) and Petit et al. (2019). We restricted our analyses to the data from 150 ms post-stimulus, based on previous

results (Kutas and Federmeier, 2011). We averaged the data from the nine electrodes of interest, and analysed the difference between the two conditions by running t-tests at each time point from 150 ms onward. We corrected for multiple comparisons by using a temporal cluster threshold calculated using Guthrie and Buchwald's (1991) method. The rationale for this method is that consecutive timepoints of an ERP reflect continuous neural processes, and thus are not statistically independent but correlated. We first calculated the autocorrelation value of our ERP waveform. We then generated 1000 random ERP series with the same autocorrelation value as our original ERP waveform. We calculated the t-test statistics between the congruent and the incongruent condition at each timepoint for our original waveform and each of the random series. For each random series, we determined the longest run of t-values below .05. A cluster was considered significant in our original waveform if it was longer than 95% of the random series' longest cluster. These analyses were carried out at the group level, and each individual separately.

### 3 Results

We examined children's brain responses to semantically congruent and incongruent spoken and visual sentences using EEG. During the experiment, children simultaneously watched and listened to sentences, and were occasionally prompted to press a button to indicate whether the sentence they just heard was correct (e.g., "the squirrel stored nuts in the *tree*") or incorrect (e.g., "the squirrel stored nuts in the *door*").

#### 3.1 Behavioural accuracy

Participants ( $n = 20$ ) performed the button-press task with a high degree of accuracy (mean percent correct:  $M = 97.17\%$ ,  $SD = 3.29\%$ , range = [90%, 100%]), indicating that they understood the meaning of the sentences and were able to notice semantic anomalies. They also responded within the required time on 99.3% of trials (mean reaction time:  $M = 1.63$  s,  $SD = 0.41$ , range = [0.51, 4.02]).

#### 3.2 Multivariate Pattern Analyses results

Using temporally- and spatially-unconstrained multivariate classification analysis, we could decode whether the target word was semantically congruent or incongruent with the sentence in 65% of participants (13/20 participants, Figure 2). Individual decoding accuracies ranged from 68 to 49%, with effect sizes ranging from 4.08 to -.27. Using all of the data

available allowed us to detect statistical effects of semantic violation in two thirds of individuals. We did not find a significant correlation between the decoding accuracy and the participants' age (Spearman correlation  $r = .136$ ,  $p = .568$ ).

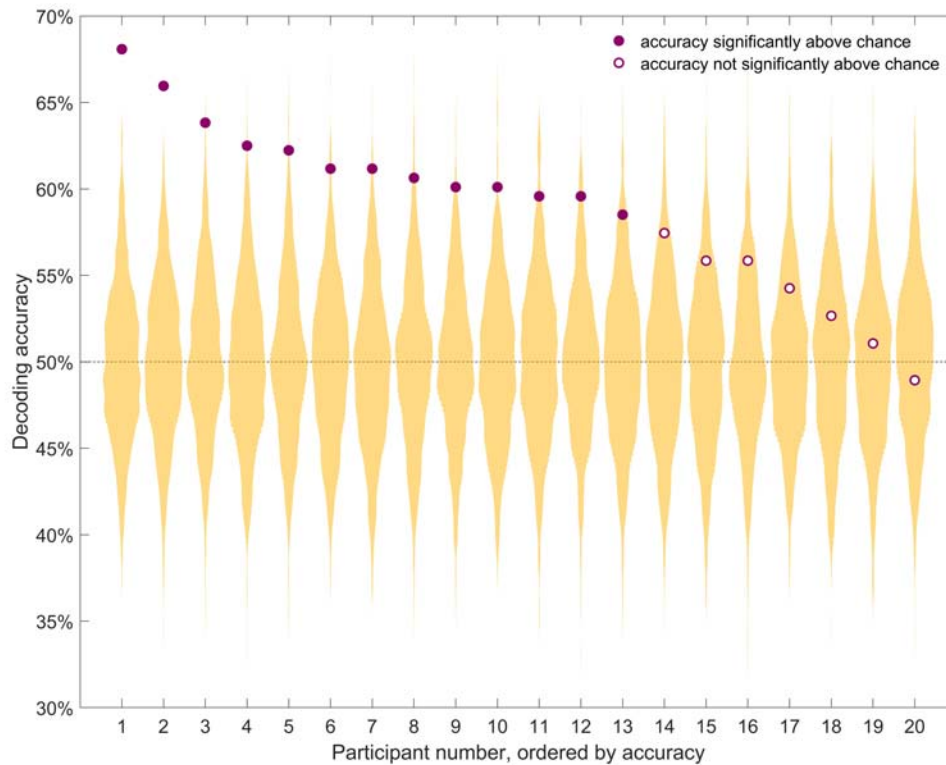

Figure 2. Individual decoding accuracy for classification of identical target words in congruent and incongruent contexts. Purple circles indicate decoding accuracy for each participant. The yellow distribution shows the null distribution obtained by the permutation test for that participant. Thirteen out of 20 participants had a decoding accuracy significantly above chance (full purple circles). Chance (50%) is indicated by the horizontal dashed line. Participants are sorted by decoding accuracy.

### 3.3 Time-resolved MVPA

As our main result yields optimal statistical power by trading off spatial and temporal resolution, we conducted a series of follow-up analysis to qualify when and where the effect of interest arose. First, we used time-constrained multivariate classification analyses, to extract the temporal evolution of decoding accuracy for each participant (Figure 3). Restricting the classifier to short time windows, and repeating this over time, shows the time course with which information is decodable from the spatial pattern of activity across the

scalp. This analysis revealed substantial variability in the timecourse of the effect across participants. While three participants (P5, P6 and P12) showed decodable information about the semantic condition at around 400ms, in line with classic N400 effects, others showed decodable semantic information earlier (200ms, P9) or later (P1, P3, P9). As expected, this approach was less sensitive than the main analysis, because the classifier was not given the entire length of the epoch to distinguish between the conditions, and because the multiple comparisons inherent in this approach necessitated a more stringent alpha level for inference. Of the 13 participants with significant decoding over time and space, only 7 retained enough spatial information to be decoded using this approach.

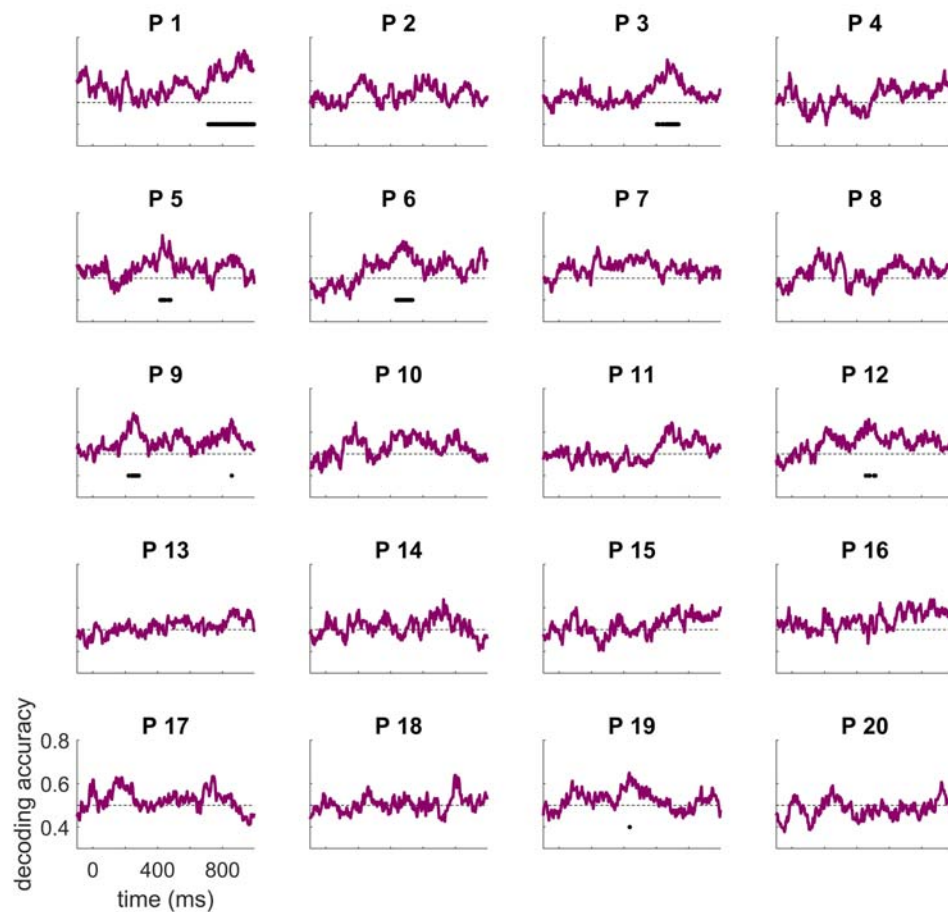

Figure 3. Individual time-resolved decoding accuracies. Chance (50%) is indicated by the horizontal dashed line. Accuracy significantly above chance is indicated by a solid black horizontal line for each participant (after multiple comparison correction). Participant numbering as in Figure 2, six participants had decoding accuracy significantly above chance.

### 3.4 Time-space resolved MVPA

Next, we used a time and space resolved decoding approach to illustrate both when and where there was discriminative information for each individual (Figure 4). There was substantial inter-subject variability in the regions and times that are informative for the classifier. While some participants showed high accuracy at times and regions that correspond to the typical univariate N400 effect (i.e., a centroparietal effect around 400ms, e.g., P5, P6, P8), others showed high accuracies at unexpected times (e.g., late, P11) and/or at unexpected locations (e.g., left lateralised, P9, late and occipitotemporal, P12). To further investigate these results and examine their mapping onto univariate differential responses between conditions, we additionally extracted the N400 ERP in response to the two conditions.



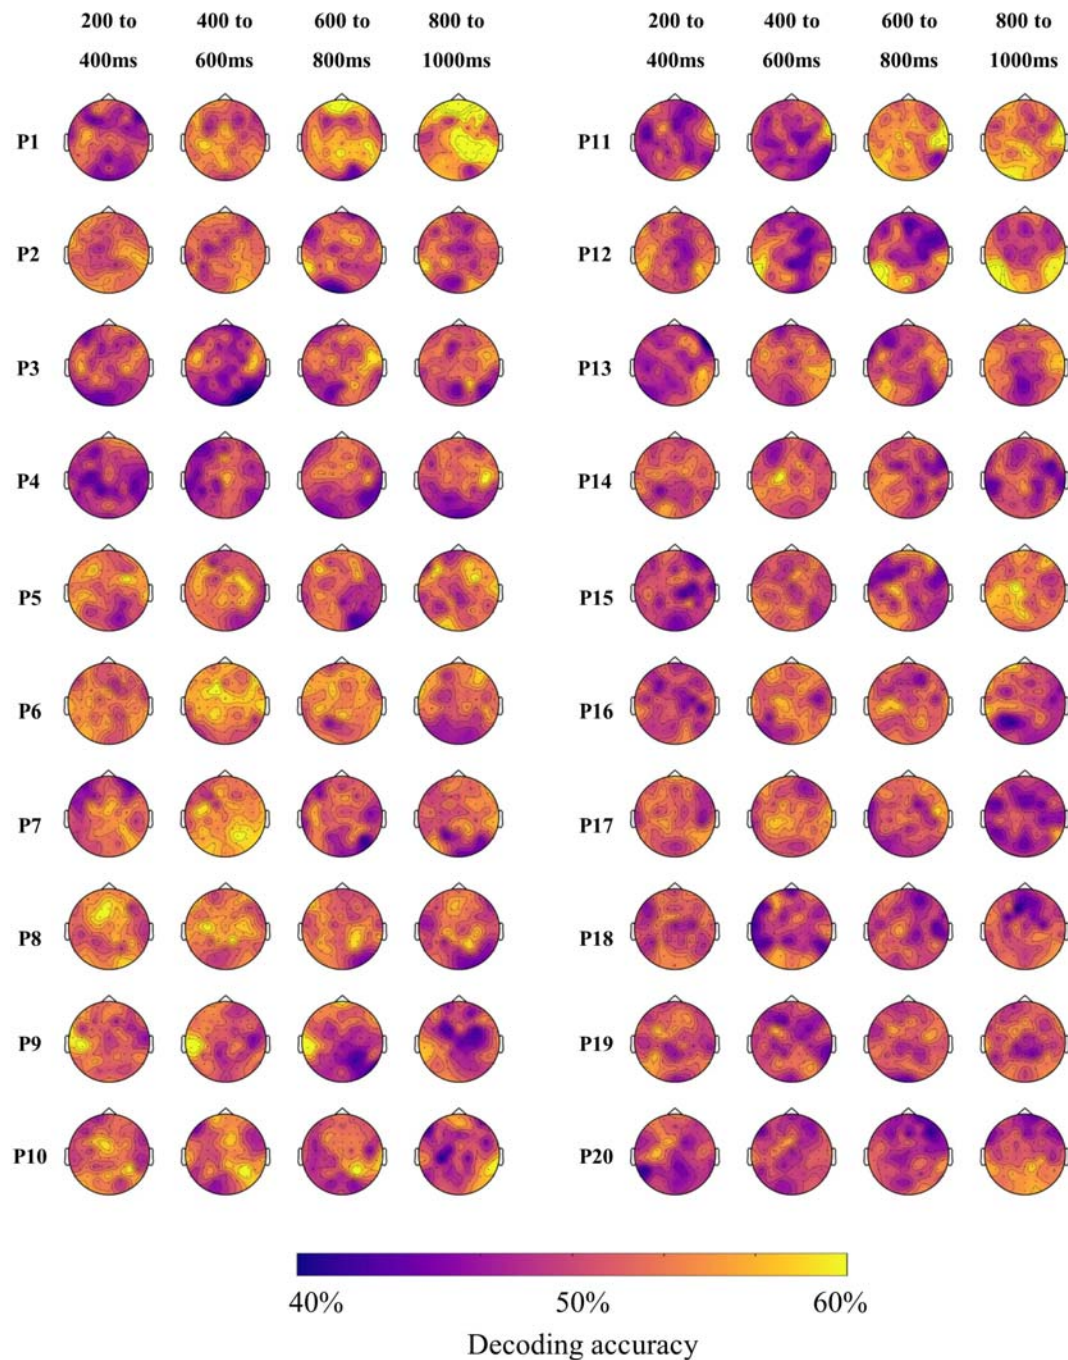

Figure 4. Individual topographic distribution of decoding accuracy for 200 ms time windows from 200 to 1000 ms after target onset. Yellow areas indicate higher decoding accuracy, and blue areas indicate lower decoding accuracy. Participant numbering as in Figure 2, participants 1-13 showed a significant effect in the main analysis.

### 3.5 Univariate analyses

Finally, we examined the N400 univariate effect by computing the voltage changes over time for the two experimental conditions (congruent and incongruent words) in a pre-specified centroparietal region of interest. This analysis was included for comparison with the wider literature and to determine the extent to which the results of our main analysis could be attributed to classic N400 effects. At the group level, we found a significant N400 effect for a cluster of timepoints from 289 – 873 ms (Figure 5, top panel). The effect was maximal at central locations from 200 – 400 ms, then extended to frontal regions at later timepoints (Figure 5, bottom panel).

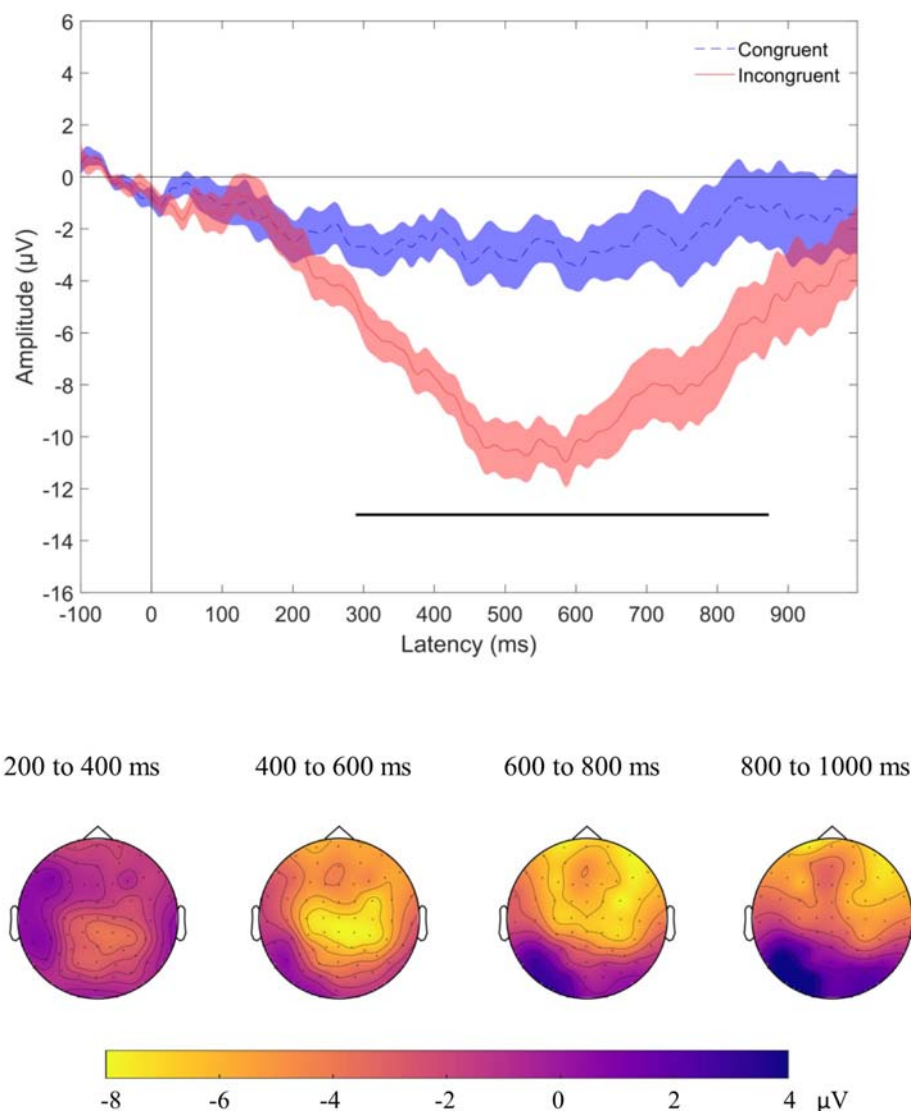

Figure 5. Group N400 effect. Top panel displays grand average ERPs ( $n=20$ ), with congruent



(dashed blue) and incongruent (solid red) conditions for the signal averaged over our region of interest. Shading indicates standard error of the mean. Time points at which there was a statistical difference between conditions are indicated with a solid black line under the plot ( $p < 0.05$ , after cluster correction for multiple comparisons). Bottom panel illustrates the topographic map of the N400 effect (unrelated minus related condition) from 200 to 1000 ms after target onset in the group. Yellow colours indicate a negative difference between the two conditions (incongruent more negative than congruent), while blue colours indicate a positive difference. The N400 effect was distributed over central and centro-frontal regions.

At the individual level, 45% of participants showed a significant univariate N400 effect for at least one significant cluster of time points in our region of interest (9/20 participant, figure 6). To summarise across analyses, 7 of the 13 participants with significant decoding results also showed a detectable N400 effect, while the remaining 5 did not. Only one participant (P17) showed a detectable N400 effect in the absence of significant MVPA classification.

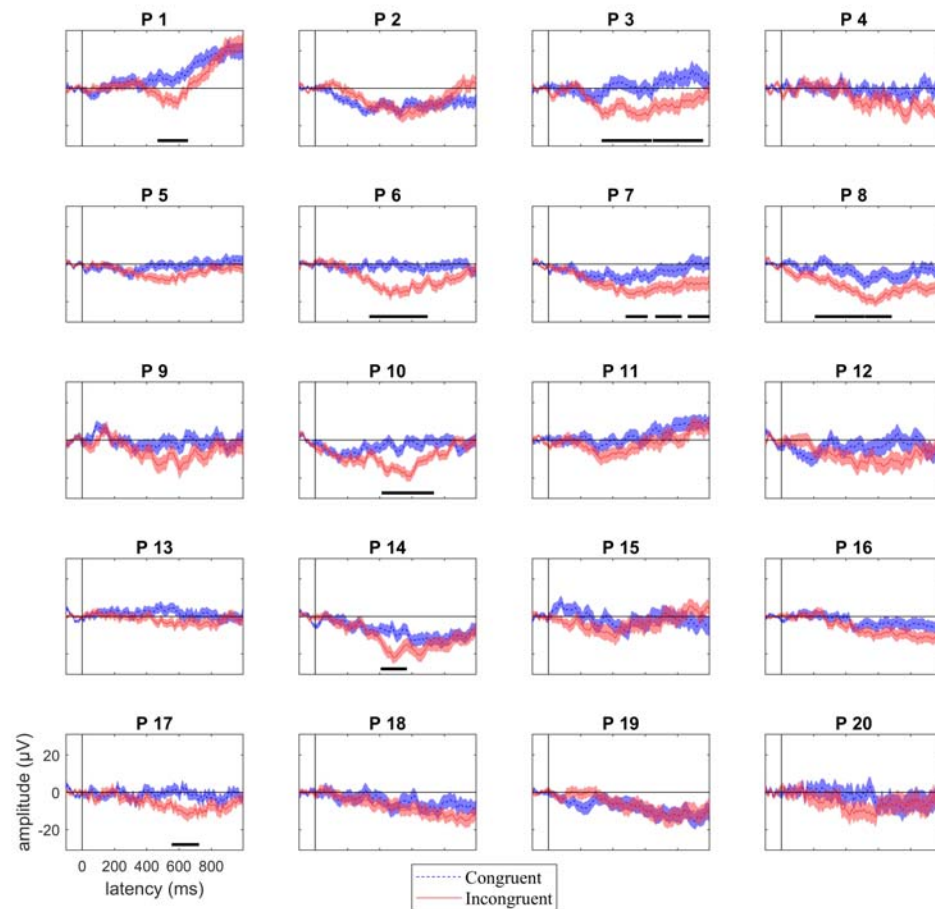

Figure 6. Individual participant responses to target words following congruent (dashed blue) and incongruent (solid red) sentences in our region of interest. Shading indicates standard error of the mean. Time points where there was a statistically significant N400 effect are indicated with a solid, horizontal, black line. P indicates participant, with participant numbering as in Figure 2. 45% (9/20) of participants showed a statistical univariate N400 effect.

The topology of the N400 effect was highly variable across participants (Figure 7) in line with the time-space-resolved MVPA analysis (above) and our previous work (Petit et al, 2019).

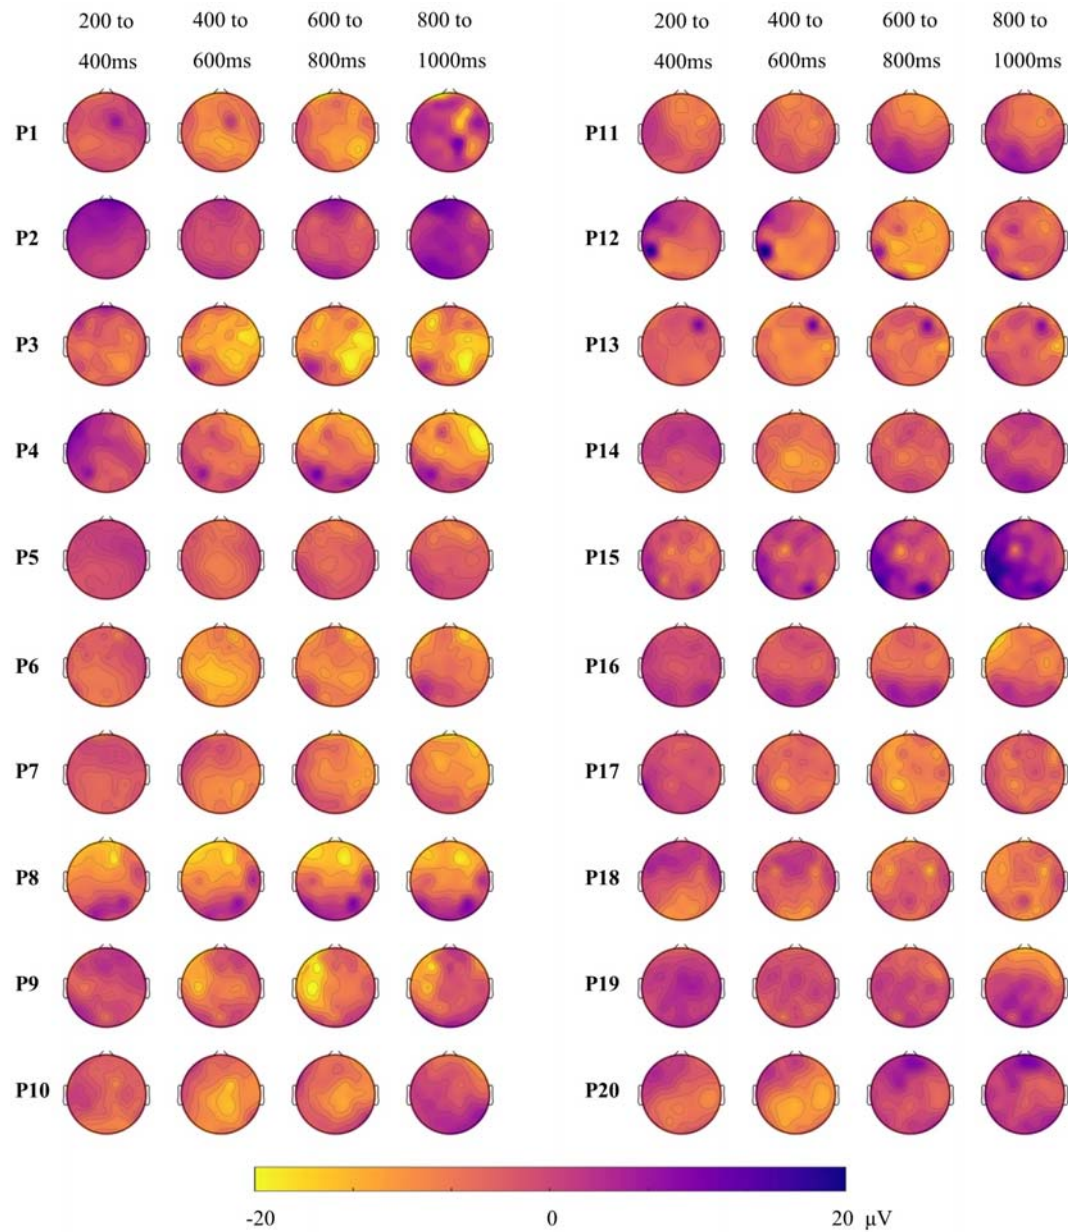

Figure 7. Individual topographic maps of the N400 effect (unrelated minus related condition) for 200 ms time windows from 200 to 1000 ms after target onset. Yellow colours indicate a negative difference between the two conditions (incongruent more negative than congruent), while blue colours indicate a positive difference. The topography of the N400 effect varied across individuals. P indicates participant, with participant numbering as in Figure 2.

## 4 Discussion

Recent electrophysiological evidence shed light on the semantic processing of spoken language in minimally-verbal autistic children (DiStefano et al., 2019). This has important implications for our understanding of brain processing in autism, and for the care and treatment of these individuals. However, heterogeneity in the neural signals, even in neurotypical children, is yet to be addressed. This study validates a multi-modal N400 paradigm to assess lexico-semantic processing from electrophysiological activity, and reports on the reliability of neural signals across individual neurotypical children. We recorded EEG from children while they were watching video-animated sentences with matched correct and incorrect endings, and used two complementary approaches to analyse their brain data. Using Multivariate Pattern Analyses (MVPA) to pool information over both space and time, we detected patterns of brain activity that discriminated between the two semantic conditions in 65% of individual children. Further investigation revealed that the patterns of discriminative activity were variable across individuals, ranging both in topography and in time. We additionally analysed the N400 ERP using a univariate approach, and found a robust N400 effect in the central location at the group level, as well as in 45% of individual participants. We present a summary of these analyses in Table 2.

Table 2. Summary of individuals' effect in different analyses. 'Yes' indicates that we found a significant effect for this participant.

| Participant number | Time- and space-constrained MVPA | Time-resolved MVPA | Univariate N400 |
|--------------------|----------------------------------|--------------------|-----------------|
| 1                  | Yes                              | Yes                | Yes             |
| 2                  | Yes                              | No                 | No              |
| 3                  | Yes                              | Yes                | Yes             |
| 4                  | Yes                              | No                 | No              |
| 5                  | Yes                              | Yes                | Yes             |
| 6                  | Yes                              | Yes                | Yes             |
| 7                  | Yes                              | No                 | Yes             |
| 8                  | Yes                              | No                 | Yes             |
| 9                  | Yes                              | Yes                | No              |
| 10                 | Yes                              | No                 | Yes             |
| 11                 | Yes                              | No                 | No              |
| 12                 | Yes                              | Yes                | No              |

|    |     |     |     |
|----|-----|-----|-----|
| 13 | Yes | No  | Yes |
| 14 | No  | No  | No  |
| 15 | No  | No  | No  |
| 16 | No  | No  | No  |
| 17 | No  | No  | Yes |
| 18 | No  | No  | No  |
| 19 | No  | Yes | No  |
| 20 | No  | No  | No  |

Our data replicate recent findings that individual brain differences to identical auditory tokens presented in different semantic contexts can be reliably observed in about half of the participants (Cruse et al., 2014; Petit et al., 2019). For the participants not showing reliable differences, it is unclear whether our methods were not sensitive enough to detect N400 effects to semantic violations, or whether N400 effects were truly absent in some participants. In the latter case, it remains unclear whether our failure to detect differential brain responses in some participants was due to their reliance on different cognitive processes, or whether similar cognitive processes were supported by different neural substrates. It is also possible that for some participants, the incongruent sentences were not eliciting strong semantic judgements, or that these judgements became less strong over the course of the experiment. Future research should aim to explore individual differences in detail, and elucidate whether our methods lack sensitivity to detect individual subject effects or whether the effects genuinely vary between participants. We did not find any evidence for an impact of age on detectable neural effects, however, it would be interesting to assess other potential sources of inter-individual differences, such as language ability or lateralisation.

Previous work using purely auditory paradigms have found a similar (Cruse et al, 2014, Petit et al, 2019, Exp 1) or better (Petit et al, 2019, Exp 2) detection rate of brain responses to semantic violations than the current study. It thus appears that adding a visual component did not make the N400 effect stronger in individuals. We hypothesized that creating a semantic context using both visual and auditory information would increase the participants' expectation for the final word, making an incongruent ending even less predictable. This assumption was partly based on previous findings that the N400 reflects lexico-semantic access irrespective of the modality. For example, Nigam et al. (1992) found similar N400 effects for final words of written sentences, whether the final words were in written or picture format. Similarly, when testing the N400 in response to auditory words versus written words,

Holcomb and Neville (1990) found overlapping neural processes between these two modalities. However, in our study, it is also possible that adding a visual component had a detrimental effect, for example by shifting attention away from listening to the sentences. The high accuracy of participants on the task suggests that participants correctly classified the congruency of the sentences when probed, but this is not a sensitive measure of attention. In the future, presenting the animations before the auditory sentences, instead of concurrently, may alleviate this concern.

Using MVPA allowed us to detect differential brain responses to congruent and incongruent sentences in 65% of individuals (13/20 participants). Of these 13 only 8 (62%) also showed a significant N400 effect. Of the 7 participants who did not have a significant classification result, only one showed a significant univariate N400 effect. This highlights the higher sensitivity of MVPA to detect differences in the pattern of brain activity that are relevant to the semantic condition but may occur at variable times or locations, or as subtle changes in the pattern of brain activation, across individuals. In our implementation, MVPA takes data from all sensors and timepoints into account without introducing multiple comparisons (only one statistical test is performed per participant). In our univariate approach we minimised multiple comparisons by restricting our analyses to a pre-defined ROI, but with the trade-off of not being sensitive to potential differences occurring outside of this region. Only two studies have investigated decoding accuracy to classify individuals' EEG data. Geuze et al. (2013) have used a similar approach as the current study on adult participants who were presented with words that were related or unrelated with a previously-heard probe word and found above-chance decoding for all of their participants. It is likely that their higher accuracy reflects the better data quality recorded in adults, who are better able to sit still and engage with the task. More recently, Tanaka et al. (2019) reported significant decoding of single-trial semantic anomalies, with an overall accuracy of 59.5%. They, however, did not report individual-participant accuracies, making it hard to compare their results to the current findings. The current study adds to this body of literature by illustrating the capacity of classifiers to detect processing of semantic congruency in individual children performing a covert task, using rigorous and robust EEG data analyses.

Although MVPA appears to be more sensitive for detecting differences in brain activation between conditions, it does not always perform better than univariate analyses. For one participant in our study (P 17), decoding accuracy was not significantly different from

chance, while the N400 univariate effect was statistically significant. At least two accounts may explain this surprising result. Firstly, MVPA was performed on all the trials, while we cleaned the data during preprocessing before univariate analyses. It is possible that the classifier could not overlook the noise in the data or that the univariate effect was driven by a few trials, and was not consistent enough to be detected as a pattern by the classifier. We chose not to clean the data before performing MVPA as our leave-one-target out approach requires the dataset to be balanced, with the same trials present in both conditions. Removing noisy trials would have involved removing their counterpart in the other condition, as well as the trials in both conditions that had the same sentence frame as the noisy trials. Thus, for each noisy trial, we would have to reject four trials in order to keep a balanced design, which would leave too few trials to use for classification. Secondly, because the N400 effect occurred at the expected location and timing in that individual, it is likely that the univariate approach was more sensitive. However, for the purpose of a neural test of language comprehension in non-communicative populations, this typicality cannot be assumed, so it may nonetheless be preferable to use methods that can detect differences in brain activity at unexpected locations and timing. This is reflected in our data, where five participants had significant decoding but did not show an N400 effect at our pre-specified region of interest. Participant 4, for example, had a strong decoding result but showed an N400-like effect only at antero-frontal locations (see figure 8), which would not be detected with conventional N400 analyses.

## 5 Conclusion

This study aimed to assess the reliability of neural signals in response to semantic anomalies in individual neurotypical children. We used a paradigm contrasting congruent and incongruent sentences, and analysed the EEG response using different methods to illustrate the heterogeneity of children's brain responses. Despite the challenges associated with analysing individuals' EEG data, we were able to reliably detect neural responses to lexico-semantic anomalies in 65% of individual children using MVPA. Out of these, only a subset (62% of these) also showed a typical N400 ERP at the central location, indicating substantial individual variability in the neural basis of lexical-semantic processing. For the purpose of assessing language comprehension in special populations, such as non-verbal children with autism, this paradigm yields medium sensitivity. In a clinical setting, we would recommend to use the information from multiple types of analyses. The different analyses that we present



here explore the same process of lexico-semantic decisions with different assumptions about the information recorded from the brain. By comparing multiple sources of information, we can achieve higher accuracy in the detection of semantic processing: in participants showing both decoding and a significant N400 effect, we have strong evidence for intact semantic processing, constituting an important step in designing a neural test of language comprehension.

Declarations of interest: none

Funding: This work was supported by a Cognitive Postgraduate research Grant from Macquarie University

## 6 References

- Block, C.K., Baldwin, C.L., 2010. Cloze probability and completion norms for 498 sentences: Behavioral and neural validation using event-related potentials. *Behav. Res. Methods* 42, 665–670. <https://doi.org/10.3758/BRM.42.3.665>
- Cantiani, C., Choudhury, N.A., Yu, Y.H., Shafer, V.L., Schwartz, R.G., Benasich, A.A., 2016. From Sensory Perception to Lexical-Semantic Processing: An ERP Study in Non-Verbal Children with Autism. *PLOS ONE* 11, e0161637. <https://doi.org/10.1371/journal.pone.0161637>
- Chan, A.S., Cheung, J., Leung, W.W., Cheung, R., Cheung, M., 2005. Verbal Expression and Comprehension Deficits in Young Children With Autism. *Focus Autism Dev. Disabil.* 20, 117–124. <https://doi.org/https://doi.org/10.1177/10883576050200020201>
- Coderre, E.L., Chernenok, M., Gordon, B., Ledoux, K., 2017. Linguistic and Non-Linguistic Semantic Processing in Individuals with Autism Spectrum Disorders: An ERP Study. *J. Autism Dev. Disord.* 47, 795–812. <https://doi.org/10.1007/s10803-016-2985-0>
- Coderre, E.L., Chernenok, M., O’Grady, J., Bosley, L., Gordon, B., Ledoux, K., 2019. Implicit Measures of Receptive Vocabulary Knowledge in Individuals With Level 3 Autism. *Cogn. Behav. Neurol.* 32, 95. <https://doi.org/10.1097/WNN.0000000000000194>
- Cruse, D., Beukema, S., Chennu, S., Malins, J.G., Owen, A.M., McRae, K., 2014. The reliability of the N400 in single subjects: Implications for patients with disorders of



- consciousness. *NeuroImage Clin.* 4, 788–799.  
<https://doi.org/10.1016/j.nicl.2014.05.001>
- Delorme, A., Makeig, S., 2004. EEGLAB: an open source toolbox for analysis of single-trial EEG dynamics including independent component analysis. *J. Neurosci. Methods* 134, 9–21. <https://doi.org/10.1016/j.jneumeth.2003.10.009>
- DiStefano, C., Senturk, D., Spurling Jeste, S., 2019. ERP Evidence of Semantic Processing in Children with ASD. *Dev. Cogn. Neurosci.* 100640.  
<https://doi.org/10.1016/j.dcn.2019.100640>
- Geuze, J., Gerven, M.A.J. van, Farquhar, J., Desain, P., 2013. Detecting Semantic Priming at the Single-Trial Level. *PLOS ONE* 8, e60377.  
<https://doi.org/10.1371/journal.pone.0060377>
- Geytenbeek, J., Harlaar, L., Stam, M., Ket, H., Becher, J.G., Oostrom, K., Vermeulen, J., 2010. Utility of language comprehension tests for unintelligible or non-speaking children with cerebral palsy: a systematic review. *Dev. Med. Child Neurol.* 52, e267–277. <https://doi.org/10.1111/j.1469-8749.2010.03807.x>
- Giacino, J.T., Smart, C.M., 2007. Recent advances in behavioral assessment of individuals with disorders of consciousness: *Curr. Opin. Neurol.* 20, 614–619.  
<https://doi.org/10.1097/WCO.0b013e3282f189ef>
- Guthrie, D., Buchwald, J.S., 1991. Significance testing of difference potentials. *Psychophysiology* 28, 240–244.
- Harrison, A.H., Connolly, J.F., 2013. Finding a way in: a review and practical evaluation of fMRI and EEG for detection and assessment in disorders of consciousness. *Neurosci. Biobehav. Rev.* 37, 1403–1419. <https://doi.org/10.1016/j.neubiorev.2013.05.004>
- Hinterberger, T., Birbaumer, N., Flor, H., 2005. Assessment of cognitive function and communication ability in a completely locked-in patient. *Neurology* 64, 1307.  
<https://doi.org/10.1212/01.WNL.0000156910.32995.F4>
- Holcomb, P.J., Neville, H.J., 1990. Auditory and Visual Semantic Priming in Lexical Decision: A Comparison Using Event-related Brain Potentials. *Lang. Cogn. Process.* 5, 281–312. <https://doi.org/10.1080/01690969008407065>
- Kasari, C., Brady, N., Lord, C., Tager-Flusberg, H., 2013. Assessing the minimally verbal school-aged child with autism spectrum disorder. *Autism Res. Off. J. Int. Soc. Autism Res.* 6, 479–493. <https://doi.org/10.1002/aur.1334>
- Kjelgaard, M.M., Tager-Flusberg, H., 2001. An investigation of language impairment in autism: Implications for genetic subgroups. *Lang. Cogn. Process.* 16, 287–308.  
<https://doi.org/10.1080/01690960042000058>
- Kotchoubey, B., Lang, S., Mezger, G., Schmalohr, D., Schneck, M., Semmler, A., Bostanov, V., Birbaumer, N., 2005. Information processing in severe disorders of consciousness: Vegetative state and minimally conscious state. *Clin. Neurophysiol.* 116, 2441–2453.  
<https://doi.org/10.1016/j.clinph.2005.03.028>

- Kutas, M., Federmeier, K.D., 2011. Thirty years and counting: finding meaning in the N400 component of the event-related brain potential (ERP). *Annu. Rev. Psychol.* 62, 621–647. <https://doi.org/10.1146/annurev.psych.093008.131123>
- Maris, E., Oostenveld, R., 2007. Nonparametric statistical testing of EEG- and MEG-data. *J. Neurosci. Methods* 164, 177–190. <https://doi.org/10.1016/j.jneumeth.2007.03.024>
- Mathalon, D.H., Faustman, W.O., Ford, J.M., 2002. N400 and automatic semantic processing abnormalities in patients with schizophrenia. *Arch. Gen. Psychiatry* 59, 641–648.
- Nigam, A., Hoffman, J.E., Simons, R.F., 1992. N400 to Semantically Anomalous Pictures and Words. *J Cogn. Neurosci.* 4, 15–22. <https://doi.org/10.1162/jocn.1992.4.1.15>
- Oosterhof, N.N., Connolly, A.C., Haxby, J.V., 2016. CoSMoMVPA: Multi-Modal Multivariate Pattern Analysis of Neuroimaging Data in Matlab/GNU Octave. *Front. Neuroinformatics* 10, 27. <https://doi.org/10.3389/fninf.2016.00027>
- Petit, S., Badcock, N.A., Grootswagers, T., Rich, A.N., Brock, J., Nickels, L., Moerel, D., Dermody, N., Yau, S., Schmidt, E., Woolgar, A., 2019. Towards an individualised neural assessment of receptive language in children. *bioRxiv* 566752. <https://doi.org/10.1101/566752>
- Pijnacker, J., Geurts, B., van Lambalgen, M., Buitelaar, J., Hagoort, P., 2010. Exceptions and anomalies: An ERP study on context sensitivity in autism. *Neuropsychologia* 48, 2940–2951. <https://doi.org/10.1016/j.neuropsychologia.2010.06.003>
- Plesa Skwerer, D., Jordan, S.E., Brukilacchio, B.H., Tager-Flusberg, H., 2016. Comparing methods for assessing receptive language skills in minimally verbal children and adolescents with autism spectrum disorders. *Autism* 20, 591–604. <https://doi.org/10.1177/1362361315600146>
- Sharma, A., Sauer, H., Hill, H., Kaufmann, C., Bender, S., Weisbrod, M., 2017. Abnormal N400 Semantic Priming Effect May Reflect Psychopathological Processes in Schizophrenia: A Twin Study. *Schizophr. Res. Treat.* 2017.
- Sigurdardottir, S., Vik, T., 2011. Speech, expressive language, and verbal cognition of preschool children with cerebral palsy in Iceland. *Dev. Med. Child Neurol.* 53, 74–80. <https://doi.org/10.1111/j.1469-8749.2010.03790.x>
- Smith, S.M., Nichols, T.E., 2009. Threshold-free cluster enhancement: addressing problems of smoothing, threshold dependence and localisation in cluster inference. *NeuroImage* 44, 83–98. <https://doi.org/10.1016/j.neuroimage.2008.03.061>
- Tager-Flusberg, H., Kasari, C., 2013. Minimally Verbal School-Aged Children with Autism Spectrum Disorder: The Neglected End of the Spectrum. *Autism Res.* 6, 468–478. <https://doi.org/10.1002/aur.1329>
- Tanaka, H., Watanabe, H., Maki, H., Sakriani, S., Nakamura, S., 2019. Electroencephalogram-Based Single-Trial Detection of Language Expectation Violations in Listening to Speech. *Front. Comput. Neurosci.* 13. <https://doi.org/10.3389/fncom.2019.00015>

- van Heuven, W.J.B., Mandera, P., Keuleers, E., Brysbaert, M., 2014. SUBTLEX-UK: a new and improved word frequency database for British English. *Q. J. Exp. Psychol.* 2006 67, 1176–1190. <https://doi.org/10.1080/17470218.2013.850521>
- Wang, S., Yang, C., Liu, Y., Shao, Z., Jackson, T., 2017. Early and late stage processing abnormalities in autism spectrum disorders: An ERP study. *PloS One* 12, e0178542.
